# Supplementary material
Source: Frontiers journal article supplement (https://www.frontiersin.org/articles/471041)
Supplement: Table_1.xlsx [file Table_1.xlsx]

## Sheet: Notes
0 km point	10°23'29"N, 106°48'50"E

## Sheet: valley width
distance from river mouth (km)	valley width (km)
50	from here unconfined
51	16.5
52	14.31
53	14.71
54	15.77
55	16.19
56	7.2
57	7.05
58	14.17
59	12.7
60	12.69
61	12.83
62	12.9
63	12.64
64	12.88
65	13.66
66	12.89
67	12.67
68	12.76
69	14.89
70	15.97
71	16.8
72	14.28
73	13.38
74	13.59
75	12.31
76	10.07
77	9.08
78	8.26
79	8.16
80	8.4
81	8.08
82	6.38
83	6.79
84	2.86
85	3.29
86	2.52
87	4.12
88	2.31
89	5.74
90	1.6
91	2.54
92	2.23
93	2.03
94	2.69
95	4.91
96	4.15
97	3.76
98	4.76
99	3.69
100	3.54
101	5.43
102	4.7
103	4.27
104	4.74
105	4.29
106	5.77
107	5.98
108	4.38
109	3.92
110	3.47
111	3.29
112	3.33
113	1
114	0.62
115	1.57
116	0.38
117	1.06
118	0.37
119	0.29
120	0.26
121	0.35
122	0.37
123	0.33
124	0.31
125	0.3
126	0.32
127	0.3
128	0.22
129	0.24
130	0.21
131	0.24
132	0.24
133	0.24
134	0.49
135	0.18
136	0.3
137	0.34
138	0.36
139	0.25
140	0.24
141	0.26
142	0.27
143	0.3
144	0.3

## Sheet: channel width
distance from river mouth (km)	channel width (km)
0	5.54
1	5.47
2	4.66
3	3.66
4	3.1
5	2.87
6	2.83
7	2.81
8	2.86
9	2.98
10	2.97
11	2.88
12	2.78
13	2.91
14	3.16
15	2.93
16	2.32
17	1.8
18	1.71
19	1.65
20	1.6
21	1.37
22	1.17
23	0.9
24	1.06
25	1.44
26	1.57
27	1.33
28	1.22
29	1.14
30	1.28
31	1.03
32	0.75
33	1.05
34	0.87
35	1.09
36	1.16
37	1.01
38	0.71
39	0.58
40	0.98
41	1.22
42	1
43	0.9
44	1.28
45	1.49
46	1.48
47	1.23
48	1.18
49	1.44
50	1.63
51	1.59
52	1.49
53	1.57
54	1.17
55	0.85
56	0.75
57	0.7
58	0.63
59	0.54
60	0.46
61	0.46
62	0.54
63	0.55
64	1.01
65	0.97
66	0.92
67	0.46
68	0.81
69	0.9
70	1.3
71	1.09
72	0.68
73	0.74
74	0.71
75	0.76
76	0.82
77	0.81
78	0.76
79	0.7
80	0.89
81	0.75
82	0.62
83	0.74
84	1.14
85	0.78
86	0.4
87	0.54
88	0.72
89	0.38
90	0.31
91	0.68
92	0.56
93	0.58
94	0.78
95	0.51
96	0.21
97	0.43
98	0.2
99	0.36
100	0.3
101	0.41
102	0.41
103	0.24
104	0.28
105	0.15
106	0.32
107	0.23
108	0.31
109	0.32
110	0.43
111	0.18
112	0.39
113	0.35
114	0.28
115	0.28
116	0.23
117	0.29
118	0.25
119	0.23
120	0.22
121	0.21
122	0.27
123	0.21
124	0.23
125	0.25
126	0.25
127	0.25
128	0.19
129	0.19
130	0.2
131	0.2
132	0.2
133	0.21
134	0.18
135	0.18
136	0.2
137	0.23
138	0.16
139	0.17
140	0.2
141	0.2
142	0.2
143	0.2
144	0.22

## Sheet: channel sinuosity (singl. bends
distance from river mouth (km)	SI
8.86	1.04007
17.38	1.00559
22.75	1.41304
27.22	1.51316
31.69	1.03145
34.48	1.14521
38.95	2.16964
42.9	2.08889
51.68	1.09476
57.05	1.06275
60.4	1.68966
62.9	2.47115
65.61	1.19392
68.93	2.00617
71.86	1.23041
75.37	1.24405
81.18	1.02215
87.78	1.15094
89.77	1.01307
92.29	1.04595
96.16	1.52336
98.74	1.6748
102.7	1.13277
104.19	1.07368
104.98	1.13953
105.48	1.03922
106.41	1.02581
109.06	1.30935
112.03	1.63333
113.82	1.00633
115.6	1.19412
118.33	1.06051
120.65	1.04598
122.83	1.17308
125.64	1.07843
127.3	1.51408
129.4	1.11842
130.72	1.2
131.56	1.17857
132.18	1.05195
133.32	1.36111
134.9	1.48571
136.1	1.06024
136.88	1.3662
138.12	1.22368
138.72	1.0678
139.31	1.05556
139.91	1.03704
140.49	1.09091
141.27	1.37097
142.03	1.44
142.66	1.01667
143.41	1.04054
144.09	1.03947

## Sheet: channel sinuosity (comp. bends)
distance from river mouth (km)	SI
14.3	1.19111
31.69	1.41288
38.95	2.16964
42.9	2.08889
53.72	1.41037
62.9	2.47115
65.61	1.19392
68.93	2.00617
71.86	1.23041
75.37	1.24405
81.18	1.02215
90.52	1.09027
96.16	1.52336
98.74	1.6748
102.43	1.26559
108.1	1.45063
113.87	1.76433
118.33	1.06051
120.65	1.04598
122.83	1.17308
125.64	1.07843
127.3	1.51408
129.4	1.11842
130.72	1.2
132.61	1.4898
135.9	1.725
139.27	1.21455
141.27	1.37097
142.75	1.32075
144.09	1.03947

## Sheet: channel bed elevation
distance from river mouth (km)	mid channel (m)	max depth (m)
0	-9.7	-11.7
1	-10.2	-12
2	-9.5	-11.5
3	-11.7	-11.7
4	-12	-12.2
5	-11.6	-11.6
6	-11.9	-11.9
7	-11.9	-12.2
8	-11.5	-11.5
9	-11.5	-11.7
10	-12.2	-12.2
11	-12.8	-13.7
12	-12.4	-13.3
13	-12	-12
14	-10.4	-10.4
15	-8.5	-9
16	-9	-9
17	-9.5	-10
18	-8	-9.5
19	-9	-9.5
20	-8	-10.5
21	-10.5	-12
22	-12	-14
23	-18	-18
24	-20	-20
25	-12	-13
26	-9.5	-12.5
27	-15	-15
28	-13	-17
29	-12	-12
30	-13	-13
31	-14	-14
32	-18	-18
33	-12.6	-18.6
34	-16.8	-16.8
35	-11.3	-11.7
36	-10.1	-11.3
37	-11.3	-15
38	-17.7	-23.2
39	-21.4	-27.8
40	-13.3	-15.3
41	-13.7	-13.7
42	-11.3	-19.4
43	-22.3	-22.3
44	-11.3	-19.4
45	-11.5	-15.5
46	-12	-15.5
47	-15	-19.7
48	-7.7	-27.8
49	-9.8	-18.8
50	-9.9	-11.3
51	-13.3	-15.3
52	-15.5	-22.3
53	-10.6	-12
54	-13.3	-13.9
55	-16.8	-18.6
56	-15.5	-15.5
57	-16.8	-16.8
58	-11.3	-13
59	-12.2	-12.2
60	-18.8	-18.8
61	-12	-12
62	-9.5	-14.8
63	-25.9	-27.8
64	-13.7	-15.5
65	-6.6	-16.8
66	-9.7	-13.7
67	-6.6	-13.7
68	-18.8	-25.9
69	-15	-19.2
70	-9.1	-10
71	-6.7	-9.7
72	-11.3	-14.4
73	-7.7	-17.5
74	-9.5	-9.5
75	-8.2	-8.2
76	-7.7	-8.2
77	-7.7	-9.7
78	-9.5	-9.5
79	-7.7	-7.7
80	-4.9	-6.7
81	-8.4	-8.4
82	-5.8	-9.7
83	-6.7	-6.7
84	-4.9	-7.8
85	-7.7	-8.2
86	-12.2	-12.2
87	-4.7	-7.7
88	-6	-9.7
89	-8	-8.2
90	-9.9	-9.9
91	-4.9	-6
92	-4.9	-6
93	-6.6	-6.6
94	-5.8	-8.6
95	-7.5	-8
96	-4.7	-4.7
97	-4.9	-4.9
98	-8.2	-8.2
99	-7.7	-7.7
100	-6.4	-6.4
101	-6.2	-6.2
102	-4.9	-9.9
	from here no data
